# Supplementary material
Source: Springer Nature journal article supplement (https://www.springermedizin.de/resource/supplementary/13195_2014_223_MOESM4_ESM.pdf/9688510)
Supplement: MOESM4 [file 9688510]

# CSF A $\beta$ 42, tau and p-tau levels

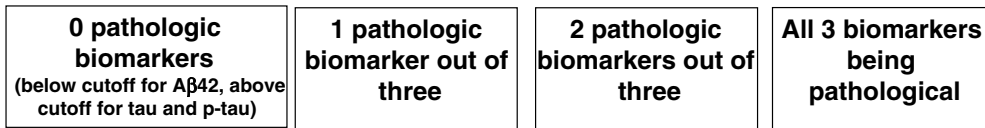

Class 0

Class 1

Class 2

Class 3

Representation of  
lesional burden in  
the brain via CSF  
biomarkers levels

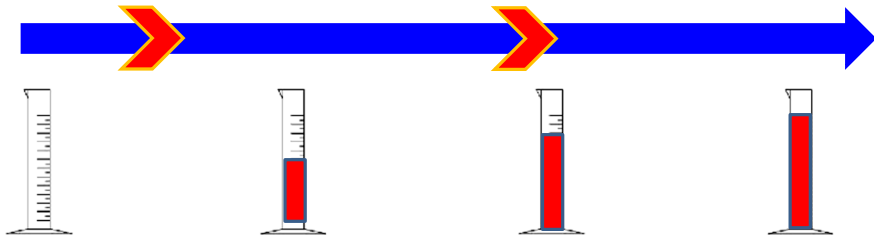

**Predictive value for AD**

(may vary depending on the AD prevalence)

9.6%

(95% CI: 6.0-13.2%)

24.7%

(95% CI: 18.0-31.3%)

77.2%

(95% CI: 67.8-86.5%)

94.2%

(95% CI: 90.7-97.7%)
